# Supplementary material
Source: Research Square preprint supplement (doi:10.21203/rs.3.rs-9746744/v1)
Supplement: Supplementary file 1 [file 8fd20ca6c9d5fbfc2ee10877.pdf]

## **Interview guide**

*Welcome and introduction*

*Content and purpose of the interview*

**Open Question to start: What does a typical day in your life look like at the moment?**

### **Needs/Wishes:**

- What is important to you in life?
- How do you imagine your care would be if, for example, you were to become dependent on help from others due to illness?

### **Current challenges:**

- Where do you currently see the biggest challenges in your everyday life?
- If your health continues to get worse in the future, where might you face challenges in managing your daily life?
- Which health services do you currently use? Have you experienced any challenges in accessing health services in the past? If so, what were they?

### **Future challenges:**

- When you think about becoming sicker and more dependent on others, what fears and worries come to mind?

### **Support:**

- What would help you in your current situation?
- Do you talk openly about dying and death? If so, with whom do you discuss these topics?

### **Wishes regarding care:**

- What would you want in terms of care from others if you were seriously ill and in need of assistance?
- How should places and facilities be designed so that you feel comfortable there?
- How could the care of seriously ill homeless people be improved in the future?

*Summary and conclusion*
