# Supplementary material
Source: Research Square preprint supplement (doi:10.21203/rs.3.rs-9746744/v1)
Supplement: Supplementary file 2 [file d02b54cf13c9c2527831d9c6.docx]

**Consolidated Criteria for Reporting Qualitative Research (COREQ)**

Fostering Equitable Access to Palliative Care for People Experiencing Homelessness and Serious Illness: A Multi-Method, Citizen Science Study Using a Theory of Change Approach

| ***Domain*** | ***Item No.*** | ***Item*** | ***Page & Line Reference*** |
| --- | --- | --- | --- |
| **Research team and reflexivity** | 1 | Interviewer/facilitator | Page 4, Lines 32-33 |
|  | 2 | Credentials | Page 4, Lines 33-34 |
|  | 3 | Occupation | Page 4, Lines 33-34 |
|  | 4 | Gender | Page 4, Lines 33-34 |
|  | 5 | Experience and training | Page 4, Line 33 |
|  | 6 | Relationship established | Page 4, Line 37-38 |
|  | 7 | Participant knowledge of the interviewer | Page 4, Lines 37-38 |
|  | 8 | Interviewer characteristics | Page 4, Line 32-36 |
| **Study design** | 9 | Methodological orientation and theory | Page 5, Lines 10,18,29 |
|  | 10 | Sampling | Page 4, Lines 24, 38 |
|  | 11 | Method of approach | Page 3, Lines 24-25, 38-39 |
|  | 12 | Sample size | Page 4, Line 32  Page 6, Line 9 |
|  | 13 | Non-participation | n/a |
|  | 14 | Setting of data collection | Page 4, Line 39 |
|  | 15 | Presence of non-participants | n/a |
|  | 16 | Description of sample | Page 6, Table 1  Page 8, Table 3 |
|  | 17 | Interview guide | Page 5, Lines 1-3 |
|  | 18 | Repeat interviews | n/a |
|  | 19 | Audio/visual recording | Page 5, Lines 3-4 |
|  | 20 | Field notes | n/a |
|  | 21 | Duration | Page 5 Line 3  Page 4 Line 27 |
|  | 22 | Data saturation | Page 5, Lines 25-27 |
|  | 23 | Transcripts returned | n/a |
| **Analysis and findings** | 24 | Number of data coders | Page 5, Line 14, 21 |
|  | 25 | Description of the coding tree | Pages 7-8  Pages 10-12 |
|  | 26 | Derivation of themes | Page 7, Fig. 1  Page 10, Fig. 2 |
|  | 27 | Software | Page 5, Lines 4-5 |
|  | 28 | Participant checking | Page 4, Lines 29-30 |
|  | 29 | Quotations presented | Pages 10-12 |
|  | 30 | Data and findings consistent | Pages 10-12 |
|  | 31 | Clarity of major themes | Page 10, Lines 2-5 |
|  | 32 | Clarity of minor themes | Pages 10-12 |
